# Supplementary material for: The protective role of DOT1L in UV-induced melanomagenesis
Source: PubMed Central journal article supplement (PMC5772495; doi:10.1038/s41467-017-02687-7), 2018-01-17
Supplement: 41467_2017_2687_MOESM2_ESM.pdf [file 41467_2017_2687_MOESM2_ESM.pdf]

## **Description of Additional Supplementary Files**

**File Name: Supplementary Data 1**

Description: Mutation of DOT1L in patients.

**File Name: Supplementary Data 2**

Description: Annotation of somatic variants in DOT1L.

**File Name: Supplementary Data 3**

Description: Summary of DOT1L mutations.

**File Name: Supplementary Data 4**

Description: Sequencing of human melanoma cell lines.

**File Name: Supplementary Data 5**

Description: KEGG pathways analysis of CHIP-seq results.

**File Name: Supplementary Data 6**

Description: Microarray analysis of NER genes.

**File Name: Supplementary Data 7**

Description: KEGG pathways analysis of microarray results.
